# Supplementary material for: Preferentially Paternal Origin of De Novo 11p13 Chromosome Deletions Revealed in Patients with Congenital Aniridia and WAGR Syndrome
Source: Genes (Basel). 2020 Jul 17;11(7):812. doi: 10.3390/genes11070812 (PMC7397088; doi:10.3390/genes11070812)
Supplement: Supplementary file 1 [file genes-11-00812-s001.xlsx]

## Sheet: Лист3
Supplementary Table to the manuscript:
Vasilyeva et al. Preferentially Paternal Origin of de novo 11p13 Chromosome Deletions Revealed in Patients with Congenital Aniridia and WAGR Syndrome. Genes 2020.
Table S1: Summary of analyzed patients.
Patient's ID	Diagnosis	Deletion left border	Deletion right border	Origin	Father's age	Mother's age	Complete/Partial	Nystagmus	Keratopathy	Cataract	Glaucoma	Fovea hypoplasia	Optic disk hypoplasia	Microcornea	Other in eyes	Other systemic findings
A-25	Aniridia	31780904	31789463	nd	26	28	partial	1	0	0	0	1	1	1	0	Perinatal CNS affection
A-36	Aniridia	31628232	32296427	pat	30	33	complete	1	0	0	1	1	1	0	0	Subepidermal brain cysts, kidneys morpho;ogy anomalies
A-30	Aniridia	27636398	33331464	pat	28	28	partial	1	1	1	0	1	0	1	Peters anomaly, microphthalm, anterior segment sydgenesis	Perinatal CNS affection
52.03	WAGR	27636398	35117389	pat	37	34	complete	1	0	0	0	1	1	0	0	Nephros neoplasia, cerebral ischemia
20.03	Aniridia	30210128	32413841	pat	25	25	complete	1	0	1	0	1	0	0	0	0
02.12	Aniridia	31285887	31628232	pat	27	28	complete	1	1	1	0	1	1	0	0	Nephroptosis
09.03	Aniridia	31285887	31628232	nd	28	27	complete	0	0	0	0	1	0	1	0	Perinatal CNS affection
04.14	Aniridia	31347785	31794631	mat	27	28	complete	1	1	1	1	1	1	0	0	0
36.03	Aniridia	30210128	32081884	pat	31	31	complete	1	1	1	0	1	0	0	0	Subepidermal brain cysts, dilation of renal pelvis, perinatal CNS affection, visceromegalia
A-26	Aniridia	31285887	32296427	pat	29	23	complete	nt	nt	nt	nt	nt	nt	nt	nt	nt
				mean	28.8	28.5
				median	28	28
				0.25	27	27.25
				0.75	29.75	30.25
				min	25	23
				max	37	34
